# Supplementary material for: Molmil: a molecular viewer for the PDB and beyond
Source: PubMed Central journal article supplement (PMC5002144; doi:10.1186/s13321-016-0155-1), 2016-08-26
Supplement: 13321_2016_155_MOESM1_ESM.pdf [file 13321_2016_155_MOESM1_ESM.pdf]

## APPENDIX I: Example renderings using Molmil

Cartoon rendering with group colouring of 1crn:

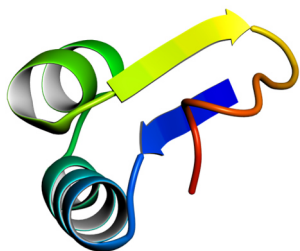

$\alpha$  trace rendering with group colouring of 1crn:

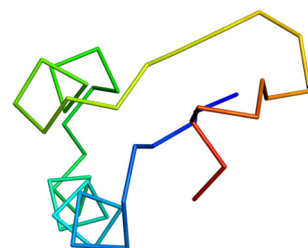

Wireframe rendering with ABEGO (30) colouring of 1crn:

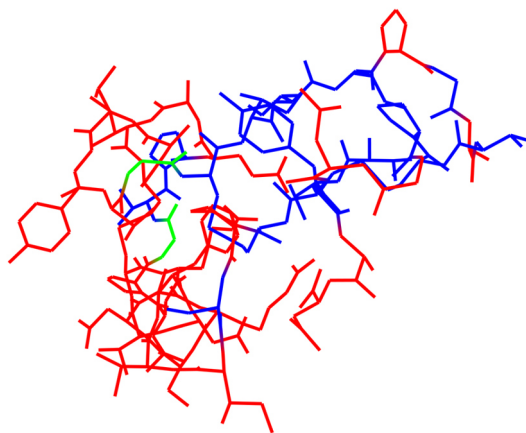

CPK rendering with element colouring of 1crn:

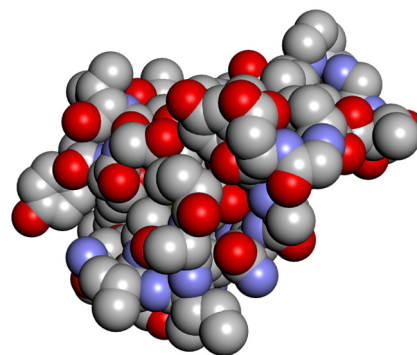

Cartoon rendering with ABEGO (30) colouring of 1crn:

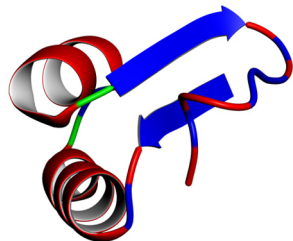

Stick rendering with element colouring of 1crn:

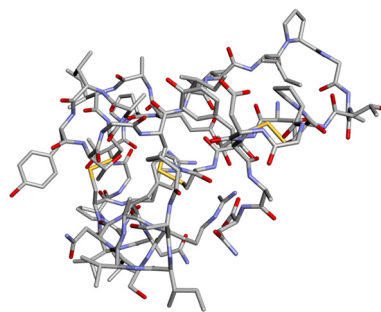

Ball-and-stick rendering with element colouring of 1crn:

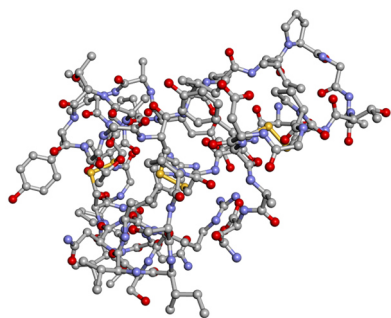

Cartoon rendering with side-chains as sticks with secondary structure and element colouring of 1crn:

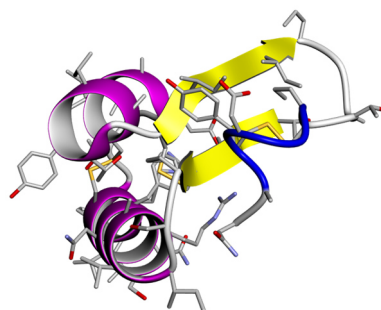

Tube rendering with secondary structure colouring of 1crn:

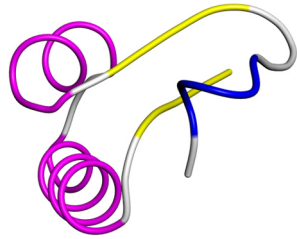

Rocket rendering with group coloring of 2prg:

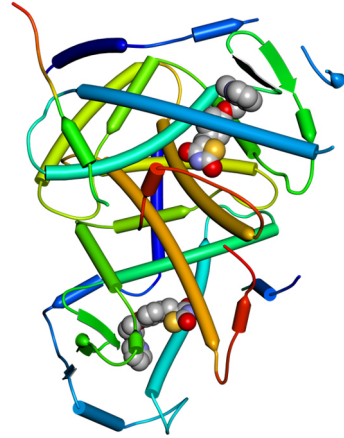

Coarse surface rendering with chain coloring of 2prg:

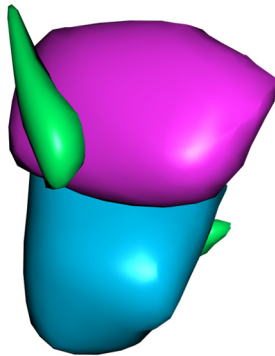

Rocket rendering (simplified) with secondary structure colouring of 3j3q:

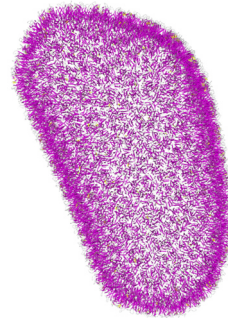

Rocket rendering (simplified) with secondary structure colouring of 3j3q (simplified) and fog to improve depth perception:

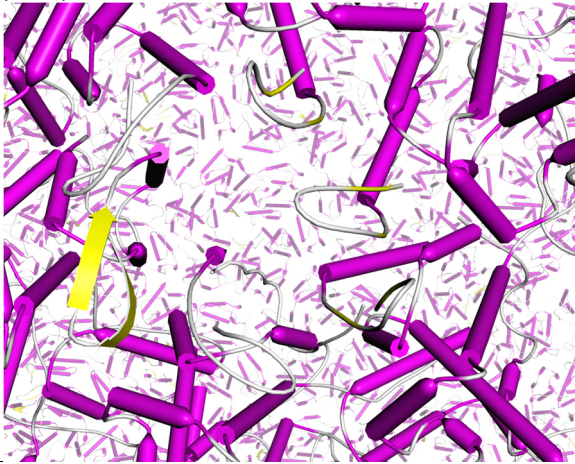

Coarse surface rendering with chain colouring of 3j3q (simplified):

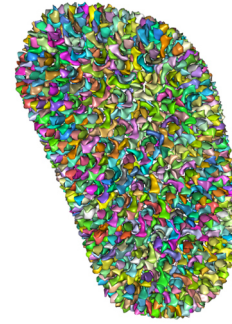

Cartoon and coarse surface rendering of the biological unit of 1bbt with group and chain colouring for the asymmetric chains and the remaining chains respectively:

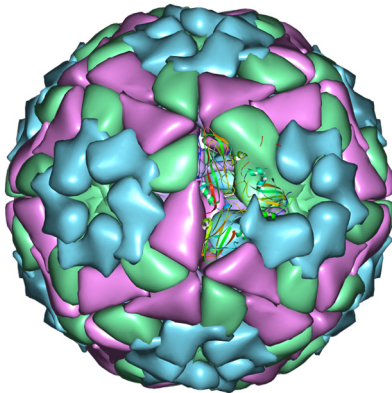

Cartoon rendering of the biological unit of 1bbt with group and chain colouring for the asymmetric chains and the remaining chains respectively:

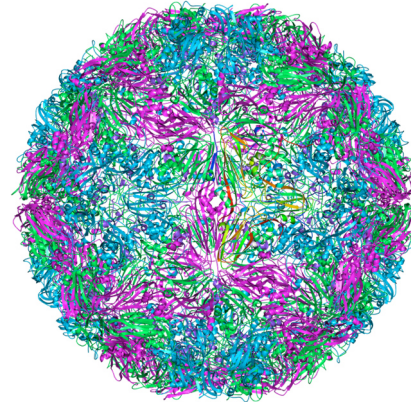

Cartoon and wireframe rendering of the biological unit of 1bbt with group and chain colouring for the asymmetric chains and the remaining chains respectively:

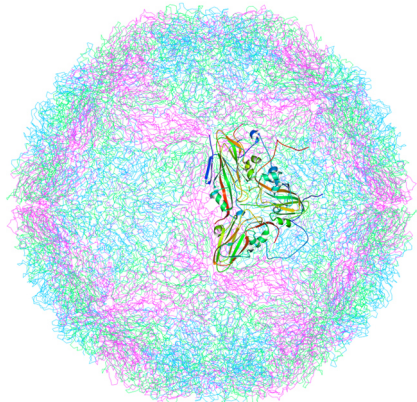

Stick rendering and iso-surface of the electron density of 1ubq, part of PDBj's EDMAP service:

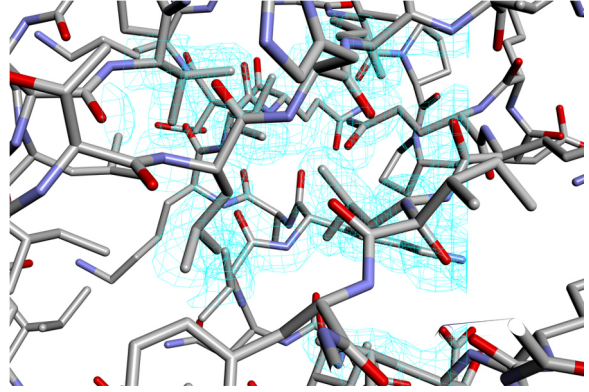

Iso-surface rendering of 1ubq with the surface colored by electrostatic potential and hydrophobicity, part of PDBj's eF-site service:

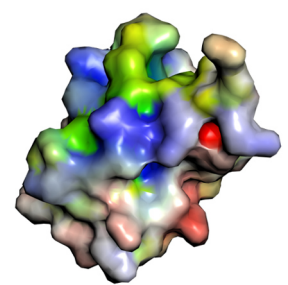

Cartoon rendering of 1ubq with secondary structure colouring and displacement vectors, part of PDBj's Promode Elastic service:

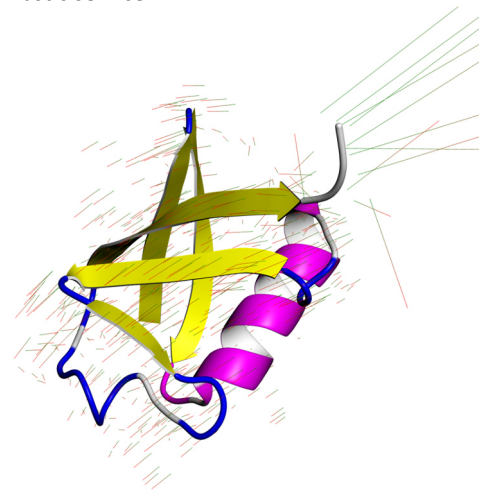

## APPENDIX II: Overview of alternative WebGL based molecular viewers

|                    |                                                                                                                                                     |
|--------------------|-----------------------------------------------------------------------------------------------------------------------------------------------------|
| GLmol              | Basic PDB viewer, one if not the earliest WebGL viewer<br><a href="http://webglmol.osdn.jp/index-en.html">http://webglmol.osdn.jp/index-en.html</a> |
| JSmol/WebGL (31)   | Limited functionality version of Jmol using HTML5+WebGL<br><a href="http://jmol.sourceforge.net/">http://jmol.sourceforge.net/</a>                  |
| PV (30)            | PDB viewer developed by Swiss-Model and used by the RCSB<br><a href="https://github.com/biasmv/pv">https://github.com/biasmv/pv</a>                 |
| 3Dmol.js (32)      | Developed by the university of Pittsburg.<br><a href="https://github.com/3dmol/3Dmol.js">https://github.com/3dmol/3Dmol.js</a>                      |
| NGL (33)           | Developed by the Charité–Universitätsmedizin Berlin<br><a href="https://github.com/arose/ngl">https://github.com/arose/ngl</a>                      |
| ChemDoodle WC (34) | Commercial library (free to use) developed by iChemLabs<br><a href="https://web.chemdoodle.com/">https://web.chemdoodle.com/</a>                    |
| Speck              | High quality renderer for small molecules<br><a href="https://github.com/wwwtyro/speck">https://github.com/wwwtyro/speck</a>                        |
| iCn3D              | PDB viewer used by the NCBI<br><a href="https://github.com/ncbi/icn3d">https://github.com/ncbi/icn3d</a>                                            |
